# Supplementary material
Source: publisher figshare collection journal article supplement (https://wiley.figshare.com/articles/dataset/_/3564972)
Supplement: Supplementary file 1 [file 1]

Chan, K.-S., N. C. Stenseth, K. Lekve, and J. Gjøsæter. 2002. Modeling the population dynamical effects of pulse disturbances: the algae bloom along the Norwegian Skagerrak coast in 1988. *Ecology* 00: 000-000.

**Appendix A: Derivation of a fjord-based, age structured model for cod (*Gadus morhua* L.) dynamics along the Norwegian Skagerrak coast.**

Derivation of Eqns (1) through (4)

We now derive equations (2a)-(2c) from (1a)-(1c). First, we generalize (1a)-(1c) by replacing  $Z_{f,t}$  by  $(Z_{f,t} + \lambda x_{f,t}^{(0)})$  and incorporating the covariate species in (1b) to obtain

$$X_{s,t} = (Z_{f,t} + \lambda x_{f,t}^{(0)}) \exp(\alpha_s + \alpha_t + \varepsilon_{s,t}) \quad (\text{A1a})$$

$$Y_{s,t} = X_{s,t-1} \exp(-\beta x_{s,t-1} - \gamma y_{s,t-1} + \delta w_{s,t-1}) \quad (\text{A1b})$$

$$Z_{f,t} = \sum m_t Y_{s,t-1} + \theta_t Z_{f,t-1}. \quad (\text{A1c})$$

In the log-scale, the preceding equations become

$$x_{s,t} = \log(\exp(z_{f,t}) + \lambda x_{f,t}^{(0)}) + \alpha_s + \alpha_t + \varepsilon_{s,t} \quad (\text{A2a})$$

$$y_{s,t} = (1 - \beta)x_{s,t-1} - \gamma y_{s,t-1} + \delta w_{s,t-1} \quad (\text{A2b})$$

$$z_{f,t} = \log(\sum m \exp(-F_{1,t-1} + y_{s,t-1}) + \theta \exp(-F_{2,t-1} + z_{f,t-1})), \quad (\text{A2c})$$

where  $x_{s,t} = \log(X_{s,t})$ ,  $y_{s,t} = \log(Y_{s,t})$ , and  $z_{f,t} = \log(Z_{f,t})$ ; all summations sums over all sites  $s$  in a fjord  $f$ . Note that  $m_t = m \exp(-F_{1,t-1})$  and  $\theta_t = \theta \exp(-F_{2,t-1})$ , where the  $F$ 's denote fishing mortality. Consider the case that  $\lambda=0$ ,  $F_{1,t-1}=0$ ,  $F_{2,t-1}=0$ , and assume the simplified model is stationarity, with  $\mu_{Y,s}$  and  $\mu_{Z,f}$  being the stationary means of  $Y_{s,t}$  and  $Z_{f,t}$ , respectively. Also, write  $\mu_{y,s} = \log(\mu_{Y,s})$  and  $\mu_{z,f} = \log(\mu_{Z,f})$ . For the simplified model, taking expectation on both sides of Eq. (A1c) yields

$$\mu_{Z,f} = \Sigma_s m \mu_{Y,s} + \theta \mu_{Z,f}.$$

Hence,  $(1-\theta)\mu_{Z,f} = \Sigma_s m \mu_{Y,s}$ , which will be useful below. The basic idea for deriving (2a)-(2c) is to approximate the right side of (A2a)-(A2c) by a first order Taylor expansion around  $\lambda=0$ ,  $F_{1,t-1}=0$ ,  $F_{2,t-1}=0$ ,  $y_{s,t-1}=\mu_{y,s}$ ,  $z_{f,t-1}=\mu_{z,f}$  and  $z_{f,t}=\mu_{z,f}$ . Equations (2a)-(2c) are obtained by noting that for (A2a),  $\partial x_{s,t} / \partial z_{f,t} = 1$  and  $\partial x_{s,t} / \partial \lambda = x_{f,t}^{(0)} / \mu_{z,f}$ , where all derivatives are evaluated at  $\lambda=0$ ,  $F_{1,t-1}=0$ ,  $F_{2,t-1}=0$ ,  $y_{s,t-1}=\mu_{y,s}$ ,  $z_{f,t-1}=\mu_{z,f}$  and  $z_{f,t}=\mu_{z,f}$ . For equation (A2c),

$$\begin{aligned} \partial z_{f,t} / \partial F_{1,t-1} &= -(\Sigma m \mu_{Y,s}) / (\Sigma_s m \mu_{Y,s} + \theta \mu_{Z,f}) = -(1-\theta), \quad \partial z_{f,t} / \partial F_{2,t-1} = -\theta \mu_{Z,f} / (\Sigma_s m \mu_{Y,s} + \theta \mu_{Z,f}) \\ &= -\theta, \quad \partial z_{f,t} / \partial y_{s,t-1} = m \mu_{Y,s} / (\Sigma_s m \mu_{Y,s} + \theta \mu_{Z,f}), \quad \text{and} \quad \partial z_{f,t} / \partial z_{f,t-1} = \theta \mu_{Z,f} / (\Sigma_s m \mu_{Y,s} + \theta \mu_{Z,f}) = \theta. \end{aligned}$$

Define  $c_s = m \mu_{Y,s} / [(\Sigma_s m \mu_{Y,s} + \theta \mu_{Z,f})(1-\theta)]$ . Then it can be readily checked that  $\Sigma_s c_s = 1$ . Hence, (A2a)-(A2c) approximately equal

$$x_{s,t} = z_{f,t} + \Delta_f x_{f,t}^{(0)} + \alpha_s + \alpha_t + \varepsilon_{s,t} \quad (2a)$$

$$y_{s,t} = (1-\beta)x_{s,t-1} - \gamma y_{s,t-1} + \delta w_{s,t-1} \quad (2b)$$

$$z_{f,t} = d_f + (1-\theta)\Sigma_s c_s y_{s,t-1} + \theta z_{f,t-1} - [(1-\theta)F_{1,t-1} + \theta F_{2,t-1}], \quad (2c)$$

where  $d_f = \mu_{z,f} - (1-\theta)\Sigma_s c_s \mu_{y,s} - \theta \mu_{z,f}$  is a constant, and  $\Delta_f = \lambda / \mu_{Z,f}$ . Consequently, we have

$$x_{f,t} = z_{f,t} + \Delta_f x_{f,t}^{(0)} + \alpha_f + \alpha_t + \varepsilon_{f,t} \quad (3a)$$

$$y_{f,t} = (1-\beta)x_{f,t-1} - \gamma y_{f,t-1} + \delta w_{f,t-1} \quad (3b)$$

$$z_{f,t} = d_f + (1-\theta)y_{f,t-1} + \theta z_{f,t-1} - [(1-\theta)F_{1,t-1} + \theta F_{2,t-1}], \quad (3c)$$

where the last equation [Eq. (3c)] is obtained by re-labeling some of the variables in Eqs. (2) so as to make all the model-variables fjord-specific (*i.e.*,  $x_{f,t} = \Sigma_s c_s x_{s,t}$  and similarly we can define  $y_{f,t}$ ).

Next, we outline the derivation of Eq. (4). Adding to the left side of (3c) the product of  $\gamma$  times the lag 1 of the left side of (3c) and doing likewise to the right side of (3c)

eliminates the  $y$ 's from the equation, because  $y_{f,t} + \gamma y_{f,t-1} = (1-\beta)x_{f,t-1} + \delta w_{f,t-1}$ , owing to (3b). Specifically,

$$\begin{aligned}
 z_{f,t} + \gamma z_{f,t-1} &= (1+\gamma)d_f + (1-\theta)(y_{f,t-1} + \gamma y_{f,t-2}) + \theta(z_{f,t-1} + \gamma z_{f,t-2}) - [(1-\theta)(F_{1,t-1} + \gamma F_{1,t-2}) \\
 &\quad + \theta(F_{2,t-1} + \gamma F_{2,t-2})] \\
 &= (1+\gamma)d_f + (1-\theta)[(1-\beta)x_{f,t-2} + \delta w_{f,t-2}] + \theta(z_{f,t-1} + \gamma z_{f,t-2}) \\
 &\quad - [(1-\theta)(F_{1,t-1} + \gamma F_{1,t-2}) + \theta(F_{2,t-1} + \gamma F_{2,t-2})].
 \end{aligned} \tag{A3}$$

Equation (3a) implies that  $z_{f,t} = x_{f,t} - (\Delta x_{f,t}^{(0)} + \alpha_f + \alpha_t + \varepsilon_{f,t})$ . Upon substituting this expression into (A3), we obtain (4) after some algebra and noting that  $\alpha_t$  is modeled as a linear combination of water temperature and the NAO:

$$\begin{aligned}
 x_{f,t} &= (\theta-\gamma)x_{f,t-1} + (\theta\gamma + (1-\theta)(1-\beta))x_{f,t-2} + (1-\theta)\delta w_{f,t-2} \\
 &\quad + \Delta x_{f,t}^{(0)} + \Delta_f(\gamma-\theta)x_{f,t-1}^{(0)} - \Delta_f\theta\gamma x_{f,t-2}^{(0)} \\
 &\quad + const_f + \varepsilon_{f,t} + (\gamma-\theta)\varepsilon_{f,t-1} - \theta\gamma\varepsilon_{f,t-2} \\
 &\quad + \{-(1-\theta)F_{1,t} + \theta F_{2,t}\} - \gamma[(1-\theta)F_{1,t-1} + \theta F_{2,t-1}] \\
 &\quad + weather_t
 \end{aligned} \tag{4}$$

where  $weather_t = \eta_0 T_t + \eta_1 T_{t-1} + \eta_2 T_{t-2} + \kappa_0 nao_t + \kappa_1 nao_{t-1} + \kappa_2 nao_{t-2}$  (where further  $\eta_0 = \eta$ ,  $\eta_1 = (\gamma-\theta)\eta$  and  $\eta_2 = -\gamma\theta\eta$ , and  $\kappa_0 = \kappa$ ,  $\kappa_1 = (\gamma-\theta)\kappa$  and  $\kappa_2 = -\gamma\theta\kappa$ ) and  $const_f = (1+\gamma)d_f + (1-\theta)(1+\gamma)\alpha_f$ .

**Appendix-Table 1a:** A complete list of variables and their description.

| <b>Variables</b>    |                                                                                         |
|---------------------|-----------------------------------------------------------------------------------------|
| <b>Symbol</b>       | <b>Description</b>                                                                      |
| $\varepsilon_{s,t}$ | stochastic effect (white noise) on cod reproduction at site $s$ in year $t$             |
| $\varepsilon_{f,t}$ | (weighted) stochastic effect (white noise) on cod reproduction in fjord $f$ in year $t$ |
| $I_t$               | dummy variable of the 1988 bloom; equals 1 for $t=1988$ and 0 otherwise                 |
| $nao_t$             | Northern Atlantic Oscillation (NAO) index in year $t$                                   |
| $T_t$               | spring water temperature in year $t$                                                    |
| $w_{s,t}$           | log abundance of covariate species at site $s$ in year $t$                              |
| $w_{f,t}$           | (weighted) log abundance of covariate species in fjord $f$ in year $t$                  |
| $x_{f,t}^{(0)}$     | amount (in million) of larvae released in fjord $f$ in year $t$                         |
| $X_{s,t}$           | 0-group cod abundance at site $s$ (within fjord $f$ ) in year $t$                       |
| $x_{s,t}$           | log 0-group cod abundance at site $s$ (within fjord $f$ ) in year $t$                   |
| $x_{f,t}$           | (weighted) log 0-group cod abundance in fjord $f$ and in year $t$                       |
| $Y_{s,t}$           | 1-group cod abundance at site $s$ (within fjord $f$ ) in year $t$                       |
| $y_{s,t}$           | log 1-group cod abundance at site $s$ (within fjord $f$ ) in year $t$                   |
| $y_{f,t}$           | (weighted) log 1-group cod abundance in fjord $f$ and in year $t$                       |
| $Z_{f,t}$           | abundance of adult and mature cod in fjord $f$ in year $t$                              |
| $z_{f,t}$           | log abundance of adult and mature cod in fjord $f$ in year $t$                          |

**Appendix-Table 1b:** A complete list of parameters and their description.

| Parameters                     |                                                                                                              |
|--------------------------------|--------------------------------------------------------------------------------------------------------------|
| Symbol                         | Description                                                                                                  |
| $a_0, a_1, a_2$                | common direct (lag1, lag2) bloom effect on the (weighted) log 0-group abundance of any given fjord           |
| $A_f$                          | direct bloom effect on the (weighted) log 0 -group abundance in fjord $f$                                    |
| $\alpha_s$                     | site effect in cod reproduction                                                                              |
| $\alpha_t$                     | year effect in cod reproduction                                                                              |
| $ar_1, ar_2$                   | Lag 1 and lag 2 autoregressive coefficients in equation (5)                                                  |
| $\beta$                        | within-cohort intraspecific effect                                                                           |
| $B_f$                          | lag-1 bloom effect on the (weighted) log 0 -group abundance in fjord $f$                                     |
| $c_s$                          | relative 1-group cod abundance at site $s$ within fjord $f$                                                  |
| $B_f$                          | lag-2 bloom effect on the (weighted) log 0 -group abundance in fjord $f$                                     |
| $d_t$                          | intervention effect function of the 1988 bloom                                                               |
| $\delta$                       | covariate species effects                                                                                    |
| $\Delta_f$                     | fraction of the natural spawning population size that gives rise to 1 million larvae in fjord $f$            |
| $\eta$                         | equals $\eta_0$                                                                                              |
| $\eta_0, \eta_1, \eta_2$       | water temperature effects from current year, last year and two years ago.                                    |
| $F_{1,t}$                      | fishing mortality rate of the 1-group cod                                                                    |
| $F_{2,t}$                      | fishing mortality rate of the mature cod                                                                     |
| $\gamma$                       | Between-cohort intraspecific effect                                                                          |
| $\kappa$                       | equals $\kappa_0$                                                                                            |
| $\kappa_0, \kappa_1, \kappa_2$ | NAO effects from current year, last year and two years ago.                                                  |
| $\lambda$                      | average number of mature cod needed to spawn 1 million larvae                                                |
| $ma_1, ma_2$                   | lag 1 and lag 2 moving-average coefficients in equation (5)                                                  |
| $\mu_{Y,s}$                    | stationary mean 1-group abundance at site $s$ under the simplified (1a-1b) with no trends nor covariates     |
| $\mu_{Y,s}$                    | equals $\log(\mu_{Y,s})$                                                                                     |
| $\mu_{Z,s}$                    | stationary mean mature cod abundance in fjord $f$ under the simplified (1a-1b) with no trends nor covariates |
| $\mu_{Z,s}$                    | equals $\log(\mu_{Z,f})$                                                                                     |
| $m_t$                          | survival rate from the 1-group cod to 2-group                                                                |
| $\omega$                       | annual rate of change in fishing mortality of mature cod                                                     |
| $\pi$                          | common direct bloom effect on the 1-group cod                                                                |
| $\tau$                         | common indirect bloom effect on the 1-group cod                                                              |
| $\theta$                       | baseline survival rate of the mature cod (in year 1970)                                                      |
| $\theta_t$                     | survival rate of adult and mature cod                                                                        |
| $\zeta$                        | common bloom effect on the 0-group cod                                                                       |

**Appendix-Table 2 A:** Parameter estimates obtained through the model fitting assuming, for reference, no effect of the algae bloom (see Chan *et al.* 2002b);  $\Delta_f = \lambda/\mu_{Z,f}$ . Bold p-values represent significance at the 5% level. Larvae releases are only performed in some fjords.

| Parameter     | Estimate | SE     | Ratio | p-value      | Fjord name       |
|---------------|----------|--------|-------|--------------|------------------|
| $ma_1$        | -0.13    | 0.105  | -1.23 | 0.226        |                  |
| $ar_2$        | 0.45     | 0.090  | 5.02  | <b>0.000</b> |                  |
| $ma_2$        | -0.36    | 0.098  | -3.68 | <b>0.001</b> |                  |
| $\tau_1$      | -0.0073  | 0.0019 | -3.90 | <b>0.000</b> |                  |
| $k_4$         | -0.12    | 0.048  | -2.53 | <b>0.015</b> |                  |
| $\eta_0$      | -0.073   | 0.054  | -1.37 | 0.177        |                  |
| $\eta_1$      | 0.098    | 0.056  | 1.75  | 0.086        |                  |
| $\eta_2$      | 0.13     | 0.058  | 2.21  | <b>0.032</b> |                  |
| $\kappa_0$    | 0.043    | 0.031  | 1.41  | 0.164        |                  |
| $\kappa_1$    | -0.068   | 0.033  | -2.02 | <b>0.049</b> |                  |
| $\kappa_2$    | -0.055   | 0.037  | -1.49 | 0.143        |                  |
| $\Delta_1$    | 0.13     | 0.054  | 2.33  | <b>0.024</b> | Torvefjord       |
| $\Delta_2$    | -0.041   | 0.030  | -1.39 | 0.171        | Topdalsfjord     |
| $\Delta_3$    | 0.036    | 0.017  | 2.13  | <b>0.038</b> | Høvåg            |
| $\Delta_4$    | 0.045    | 0.014  | 3.30  | <b>0.002</b> | Bufjord          |
| $\Delta_5$    | -0.0033  | 0.0097 | -0.34 | 0.735        | Flødevigen       |
| $\Delta_7$    | -0.0047  | 0.0086 | -0.54 | 0.590        | Sandnesfjord     |
| $\Delta_8$    | 0.021    | 0.018  | 1.21  | 0.234        | Søndeledfjord    |
| $\Delta_{11}$ | 0.016    | 0.27   | 0.57  | 0.569        | Kilsfjord        |
| $\Delta_{16}$ | -0.011   | 0.010  | -1.11 | 0.272        | Nøtterø          |
| $\Delta_{17}$ | 0.018    | 0.0061 | 2.99  | <b>0.004</b> | Holmestrand area |
| $\Delta_{20}$ | -0.0086  | 0.0046 | -1.88 | 0.067        | Hvaler           |

**Appendix-Table 2 B:** Parameter estimates of the ecological parameters obtained from the equating the coefficients in Eqs. (4) and (5). Bold p-values represent significance at the 5% level.

| Term        | Estimate | SE    | Ratio | p-value |
|-------------|----------|-------|-------|---------|
| $\theta$    | 0.67     | 0.071 | 9.49  | Term    |
| $\gamma$    | 0.54     | 0.11  | 4.77  | Term    |
| $\beta$     | 0.73     | 0.094 | 7.80  | Term    |
| Pollack old | -0.37    | 0.16  | -2.35 | Term    |
