# Supplementary material
Source: publisher figshare collection journal article supplement (https://wiley.figshare.com/articles/dataset/_/3564972)
Supplement: Supplementary file 2 [file 1 › appendix-A.htm]

Ecological Archives E073-002-A1


### *Ecological Archives* M073-002-A1

### **Kung-Sik Chan, Nils Chr. Stenseth, Kyrre Lekve, and Jakob Gjøsæter. 2003. Modeling pulse disturbance impact on cod population dynamics: the 1988 algal bloom of Skagerrak, Norway. *Ecological Monographs* 73:151–171.**

Appendix A. Derivation of
a fjord-based, age-structured model for cod (*Gadus morhua* L.) dynamics
along the Norwegian Skagerrak coast. Click here for
a pdf version.

Derivation of Eqs. 1 through 4.

We now derive Eqs. 2a–2c from
1a–1c. First, we generalize Eqs. 1a–1c by replacing *Zf,t*
by (*Zf,t* + *xf,t*(0))
and incorporating the covariate species in Eq. 1b to obtain

|  |  |
| --- | --- |
| *Xs,t =* (*Zf,t+ x*(0)*f,t*)exp(*s + t + s,t*) | (A.1a) |
| *Ys,t = Xs,t-*1exp(*-xs,t-*1*-ys,t-*1*+ ws,t-*1) | (A.1b) |
| *Zf,t  =  mtYs,t-*1*+ tZf,t-*1*.* | (A.1c) |

In the log-scale, the preceding
equations become

|  |  |
| --- | --- |
| *xs,t =* log(exp(*zf,t*)*+ x*(0)*f,t*)*+ s+ t+ s,t* | (A.2a) |
| *ys,t  =* (1-)*xs,t*-1*-ys,t*-1*+ws,t*-1 | (A.2b) |
| *zf,t  =* log(*m*exp(*-F*1*,t*-1*+ys,t*-1)*+*exp(-*F*2*,t*-1*+z f,t*-1)), | (A.2c) |

where *xs,t =* log(*Xs,t*), *ys,t*  = log(*Ys,t*),and*zf,t*  = log(*zf,t*); all summations sums over
all sites s in a fjord f*.* Note that *mt = m* exp(*-F*1*,t*-1)
*and t
=* exp(-*F*2*,t*-1),
where the *F’*s denote fishing mortality. Consider the case that
 = *0*,
*F*1*,t*-10*,
F*2*,t*-10,
and assume the simplified model is stationarity, with *Y,s*
and *mZ,f*being the stationary means of *Ys,t* and *Zf,t*,
respectively. Also, write *y,s
=* log(*Y,s*) and *z,f
=* log(*Z,f*). For the simplified model, taking expectation on both sides of Eq.
A.1c yields

*Z,f
= s mY,s
+ Z,f*.

Hence, (1-)*Z,f
= s
mY,s*,
which will be useful below. The basic idea for deriving Eqs. 2a–2c is to
approximate the right side of Eqs. A.2a–A.2c by a first order Taylor expansion
around  =
0, *F*1*,t*-1*=* 0*,
F*2*,t*-1*=* 0*,
ys,t*-1*= y,s,
z f,t*-1*= z,f*and *z f,t = z,f*. Equations 2a–2c are obtained by noting that for Eq. A.2a, *xs,t/zf,t
=* 1 and *xs,t/l
= x*(0)*f,t /z,f,*
where all derivatives are evaluated at 
= 0, *F*1*,t*-1 *=*0*, F*2*,t*-1*=* 0*, ys,t*-1 *= y,s*,
*z f,t*-1 *= z,f*and *z f,t = z,f.*For Eq. A.2c,

*zf,t /F1,t*-1 *= -(
mY,s)/(smY,s
+ Z,f) = -(*1*-
)*, *zf,t/F2,t*-1 *= -Z,f
/(smY,s+Z,f)*

*= -*,
 *zf,t/
ys,t*-1 *= mY,s/(smY,s
+ Z,f)*, and *zf,t /
z f,t*-1 = *Z,f/(smY,s
+ Z,f) =* .

Define *cs = mY,s*/[(*smY,s
+ Z,f*)(1*-* )].
Then it can be readily checked that *scs  =* 1*.* Hence, Eqs. A.2a–A.2c approximately
equal

|  |  |
| --- | --- |
| *xs,t = zf,t+ fxf,t*(0)*+ s+ t+ s,t* | (2a) |
| *ys,t  =* (1*-*)*xs,t*-1*-ys,t*-1*+ ws,t*-1 | (2b) |
| *zf,t  = df +* (1*-*)*csys,t*-1*+ zf,t*-1*-* [(1-)*F*1*,t*-1*+ F*2*,t*-1]; | (2c) |

where *df =z,f*-(1-)*csy,s*
-*z,f*is a constant, and *f
= /Z,f*.
Consequently, we have

|  |  |
| --- | --- |
| *xf,t = zf,t+ fx*(0)*f,t + f+ t+ f,t* | (3a) |
| *yf,t  =* (1*-*)*xf,t*-1*-yf,t*-1*+wf,t*-1 | (3b) |
| *zf,t  = df +* (1*-q)yf,t*-1*+ zf,t*-1*-* [(1-)*F*1*,t*-1*+ F*2*,t*-1], | (3c) |

where the last equation [Eq. 3c]
is obtained by re-labeling some of the variables in Eqs. 2 so as to make all
the model-variables fjord-specific (i.e., *xf,t = csxs,t*and similarly we can define *yf,t*).

Next, we outline the derivation
of Eq. 4. Adding to the left side of Eq. 3c the product of 
times the lag 1 of the left side of Eq. 3c and doing likewise to the right side
of Eq. 3c eliminates the y’s from the equation, because *yf,t
+ yf,t*-1*=* (1-)*xf,t*-1*+   
wf,t-*1*,*owing to Eq. 3b. Specifically,

|  |  |
| --- | --- |
| *zf,t + zf,t*-1  *=* (1*+* )*df +* (1*-*)(*yf,t*-1*+yf,t*-2)*+* (*zf,t*-1 *+ zf,t*-2)-[(1-)(*F*1*,t*-1*+F*1*,t*-2)  *+ (F*2*,t*-1*+ F*2*,t*-2)]  *=* (1 *+ )df +* (1-)[(1-)*xf,t*-2*+ wf,t*-2]*+* (*zf,t*-1*+zf,t*-2)  *–*[(1-)(*F*1*,t*-1*+ F*1*,t*-2)*+ (F*2*,t*-1*+ F*2*,t*-2)]*.* | (A.3) |

Equation 3a implies that *zf,t = xf,t –( fx*(0)*f,t
+ f +
t +
f,t*
). Upon substituting this expression into Eq. A.3, we obtain Eq. A.4 after some
algebra and noting that t
is modeled as a linear combination of water temperature and the NAO:

|  |  |
| --- | --- |
| *xf,t =* (*-*)*xf,t*-1*+* (*+* (1-)(1-))*xf,t*-2*+* (1-)*wf,t*-2  *+ fx*(0)*f,t + f*(*-*)*x*(0)*f,t*-1*- fx*(0)*f,t*-2  *+* const*f + f,t +* (*-q*)*f,t*-1*- f,t*-2  *+* {-[(1-)*F*1*,t + F*2*,t] -* [(1-)*F*1*,t*-1*+ F*2*,t*-1]}  *+* weather*t* | (A.4) |

where weather*t = 0Tt
+ 1Tt*-1*+ 2Tt*-2*+ k0*nao*t + k1*nao*t*-1*+ k2*nao*t*-2 (where further 0*=* , 
1 *=* (*-*)
and   
2 *= -*,
and *k*0 *= k*, *k*1 *= (-)k*
and *k*2 *= -gk*)
and const*f =* (1 *+* )*df
+* (1-)(1*+* )*f*.

Table
A1a. A complete list of variables and their description.

|  |  |
| --- | --- |
| **Variables** | |
| **Symbol** | **Description** |
| *s,t* | stochastic effect (white noise) on cod reproduction at site *s* in year *t* |
| *f,t* | (weighted) stochastic effect (white noise) on cod reproduction in fjord *f* in year *t* |
| *It* | dummy variable of the 1988 bloom; equals 1 for *t* = 1988 and 0 otherwise |
| nao*t* | Northern Atlantic Oscillation (NAO) index in year *t* |
| *Tt* | spring water temperature in year *t* |
| *ws,t* | log abundance of covariate species at site *s* in year *t* |
| *wf,t* | (weighted) log abundance of covariate species in fjord *f* in year *t* |
| *xf,t*(0) | amount (in million) of larvae released in fjord *f* in year *t* |
| *Xs,t* | 0-group cod abundance at site *s* (within fjord *f*) in year *t* |
| *xs,t* | log 0-group cod abundance at site s (within fjord *f*) in year *t* |
| *xf,t* | (weighted) log 0-group cod abundance in fjord *f* and in year *t* |
| *Ys,t* | 1-group cod abundance at site *s* (within fjord *f*) in year *t* |
| *ys,t* | log 1-group cod abundance at site *s* (within fjord *f*) in year *t* |
| *yf,t* | (weighted) log 1-group cod abundance in fjord *f* and in year *t* |
| *Zf,t* | abundance of adult and mature cod in fjord *f* in year *t* |
| *zf,t* | log abundance of adult and mature cod in fjord *f* in year *t* |

TableA1b. A complete list of variables
and their description.

|  |  |
| --- | --- |
| **Parameters** | |
| **Symbol** | **Description** |
| *a*0,*a*1, *a*2 | common direct (lag1, lag2) bloom effect on the (weighted) log 0-group abundance of any given fjord |
| *Af* | direct bloom effect on the (weighted) log 0 -group abundance in fjord *f* |
| *s* | site effect in cod reproduction |
| *t* | year effect in cod reproduction |
| ar1, ar2 | Lag 1 and lag 2 autoregressive coefficients in Eq. 5 |
|  | within-cohort intraspecific effect |
| *B**f* | lag-1 bloom effect on the (weighted) log 0 -group abundance in fjord *f* |
| *cs* | relative 1-group cod abundance at site *s* within fjord *f* |
| *B**f* | lag-2 bloom effect on the (weighted) log 0 -group abundance in fjord *f* |
| *d**t* | intervention effect function of the 1988 bloom |
|  | covariate species effects |
| *f* | fraction of the natural spawning population size that gives rise to 1 million larvae in fjord *f* |
|  | equals 0 |
| 0, 1*,*2 | water temperature effects from current year, last year and two years ago. |
| *F*1*,t* | fishing mortality rate of the 1-group cod |
| *F*2*,t* | fishing mortality rate of the mature cod |
|  | Between-cohort intraspecific effect |
|  | equals 0 |
| 0, 1, 2 | NAO effects from current year, last year and two years ago. |
|  | average number of mature cod needed to spawn 1 million larvae |
| ma1, ma2 | lag 1 and lag 2 moving-average coefficients in Eq. 5 |
| *Y,s* | stationary mean 1-group abundance at site *s* under the simplified (1a-1b) with no trends nor covariates |
| *y,s* | equals log(*Y,s*) |
| *Z,s* | stationary mean mature cod abundance in fjord f under the simplified (1a-1b) with no trends nor covariates |
| *z,s* | equals log(*µZ,f*) |
| *mt* | survival rate from the 1-group cod to 2-group |
|  | annual rate of change in fishing mortality of mature cod |
|  | common direct bloom effect on the 1-group cod |
|  | common indirect bloom effect on the 1-group cod |
|  | baseline survival rate of the mature cod (in year 1970) |
| t | survival rate of adult and mature cod |
|  | common bloom effect on the 0-group cod |

Table A2a. Parameter estimates obtained
through the model fitting assuming, for reference, no effect of the algae bloom
(see Chan et al. 2002*b*); *f
= /Z,f*.
Bold *P* values represent significance at the 5% level. Larvae releases
are only performed in some fjords.

|  |  |  |  |  |  |
| --- | --- | --- | --- | --- | --- |
| **Parameter** | **Estimate** | **SE** | **Ratio** | ***P*****value** | **Fjord name** |
| ma1 | -0.13 | 0.105 | -1.23 | 0.226 |  |
| ar2 | 0.45 | 0.090 | 5.02 | **0.000** |  |
| ma2 | -0.36 | 0.098 | -3.68 | **0.001** |  |
| 1 | -0.0073 | 0.0019 | -3.90 | **0.000** |  |
| *k*4 | -0.12 | 0.048 | -2.53 | **0.015** |  |
| 0 | -0.073 | 0.054 | -1.37 | 0.177 |  |
| 1 | 0.098 | 0.056 | 1.75 | 0.086 |  |
| 2 | 0.13 | 0.058 | 2.21 | **0.032** |  |
| 0 | 0.043 | 0.031 | 1.41 | 0.164 |  |
| 1 | -0.068 | 0.033 | -2.02 | **0.049** |  |
| 2 | -0.055 | 0.037 | -1.49 | 0.143 |  |
| 1 | 0.13 | 0.054 | 2.33 | **0.024** | Torvefjord |
| 2 | -0.041 | 0.030 | -1.39 | 0.171 | Topdalsfjord |
| 3 | 0.036 | 0.017 | 2.13 | **0.038** | Høvåg |
| 4 | 0.045 | 0.014 | 3.30 | **0.002** | Bufjord |
| 5 | -0.0033 | 0.0097 | -0.34 | 0.735 | Flødevigen |
| 7 | -0.0047 | 0.0086 | -0.54 | 0.590 | Sandnesfjord |
| 8 | 0.021 | 0.018 | 1.21 | 0.234 | Søndeledfjord |
| 11 | 0.016 | 0.27 | 0.57 | 0.569 | Kilsfjord |
| 16 | -0.011 | 0.010 | -1.11 | 0.272 | Nøtterø |
| 17 | 0.018 | 0.0061 | 2.99 | **0.004** | Holmestrand area |
| 20 | -0.0086 | 0.0046 | -1.88 | 0.067 | Hvaler |

Table A2b. Parameter estimates
of the ecological parameters obtained from the equating the coefficients
in Eqs. 4 and 5. Bold *P* values represent significance at the 5% level.

|  |  |  |  |  |
| --- | --- | --- | --- | --- |
| **Term** | **Estimate** | **SE** | **Ratio** | ***P*** **value** |
|  | 0.67 | 0.071 | 9.49 | Term |
|  | 0.54 | 0.11 | 4.77 | Term |
|  | 0.73 | 0.094 | 7.80 | Term |
| Pollack old | -0.37 | 0.16 | -2.35 | Term |

---

[Back to M073-002]
